# Supplementary material for: Chirality-dependent balance between hydrogen bonding and London dispersion in isolated (±)-1-indanol clusters
Source: Royal Society of Chemistry journal article supplement (doi:10.1039/c3cp50708d), 2013-01-01
Supplement: c3cp50708d.pdf [file c3cp50708d.pdf]

## SUPPLEMENT

Chirality-dependent balance between hydrogen bonding  
and London dispersion in isolated ( $\pm$ )-1-indanol clusters

Jonas Altnöder<sup>a</sup>, Aude Bouchet<sup>b,c</sup>, Juhyon J. Lee<sup>a</sup>, Katharina E. Otto<sup>a</sup>,

Martin A. Suhm<sup>a,\*</sup>, Anne Zehnacker-Rentien<sup>b,c,\*</sup>

*a) Institut für Physikalische Chemie, Universität Göttingen, Tammannstr. 6, 37077  
Göttingen, Germany;*

*b) Institut des Sciences Moléculaires d'Orsay, Université Paris-Sud, France;*

*c) CLUPS (Centre Laser de l'Université Paris Sud/LUMAT FR 2764), Univ Paris-Sud,  
Orsay, F-91405, France*

\*corresponding authors (msuhm@gwdg.de, anne.zehnacker-rentien@u-psud.fr)

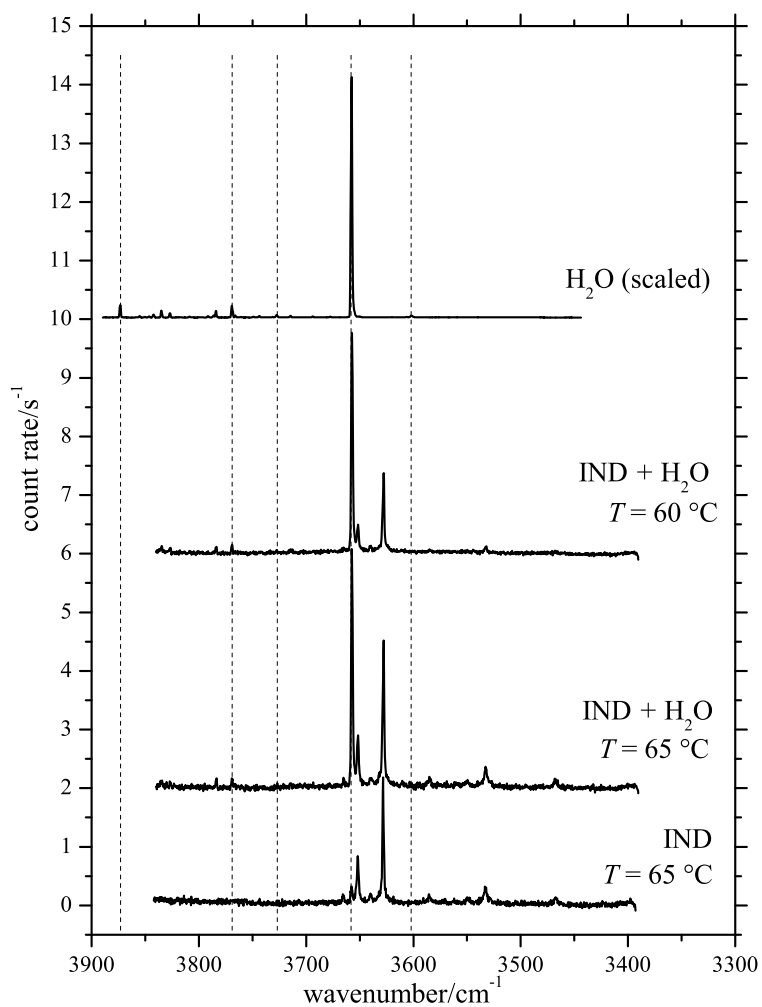

S 1: Raman jet spectra of enantiopure 1-indanol (sample temperature  $T$ , nozzle temperature 100 °C) in helium with and without deliberately added water. Some important water monomer bands are marked with vertical dashed lines. The pure water spectrum (sample/nozzle temperature 10/120 °C) is scaled to similar water content as the mixed ones.

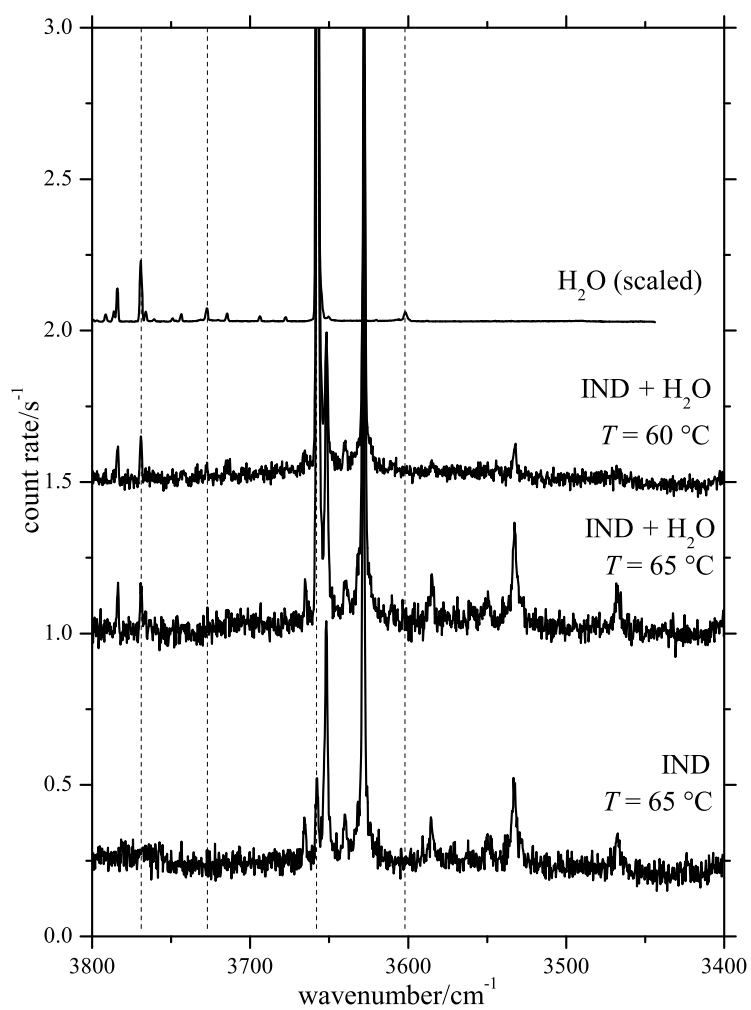

S 2: Raman jet spectra of enantiopure 1-indanol with and without deliberately added water; same spectra as in S 1, vertical scale optimized for interpreting small bands. Some important water monomer bands are marked with vertical dashed lines.

| structure | dispersion type | B97D-opt | B3LYPD3-opt | $\Delta$ |
|-----------|-----------------|----------|-------------|----------|
| eq        | $E_{D2}$        | -64.1    | -64.0       | -0.2     |
|           | $E_{D3}$        | -39.3    | -39.5       | 0.1      |
| ax        | $E_{D2}$        | -63.7    | -63.6       | -0.1     |
|           | $E_{D3}$        | -39.2    | -39.3       | 0.1      |
| HetOII    | $E_{D2}$        | -187.0   | -182.8      | -4.2     |
|           | $E_{D3}$        | -125.1   | -123.4      | -1.7     |
| HomIII    | $E_{D2}$        | -192.1   | -184.4      | -7.7     |
|           | $E_{D3}$        | -126.8   | -123.7      | -3.1     |
| HomOII    | $E_{D2}$        | -190.2   | -185.6      | -4.6     |
|           | $E_{D3}$        | -126.7   | -124.8      | -2.0     |

S 3: Analysis of absolute dispersion corrections as a function of the correction type ( $E_{D2}, E_{D3}$ ) and the molecule/dimer structure (B97D-optimized or B3LYP-D3-optimized) in kJ/mol.
